# Supplementary material for: Joint Evolutionary Trees: A Large-Scale Method To Predict Protein Interfaces Based on Sequence Sampling
Source: PLOS journal article supplement (doi:10.1371/journal.pcbi.1000267), 2009-01-22
Supplement: S1 (10.1371/journal.pcbi.1000267.s001) [file journal.pcbi.1000267.s001]

# Propensity values

| Propensity Values |      |      |      |      |      |      |      |      |      |
|-------------------|------|------|------|------|------|------|------|------|------|
| W                 | I    | F    | L    | C    | M    | V    | Y    | P    | A    |
| 2.19              | 1.41 | 2.21 | 1.56 | 1.42 | 1.46 | 1.25 | 1.76 | 1.03 | 0.85 |
| T                 | H    | G    | S    | Q    | N    | E    | D    | K    | R    |
| 0.7               | 1.3  | 0.9  | 0.8  | 1.0  | 0.9  | 0.7  | 0.7  | 0.6  | 1.1  |

TAB. 1 – Propensity values describing physical-chemical properties of residues at the interface as estimated in (Nagi and Braun 2007). A value  $\geq 1$  suggests that a residue most likely belongs to an interface rather than outside of it.
